# Supplementary material
Source: publisher site journal article supplement (https://www.degruyterbrill.com/publication/isbn/9783050048642/downloadAsset/9783050048642_Buchinformation.pdf)
Supplement: Supplementary file 1 [file 9783050048642_Buchinformation.pdf]

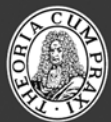

# Akademie Verlag

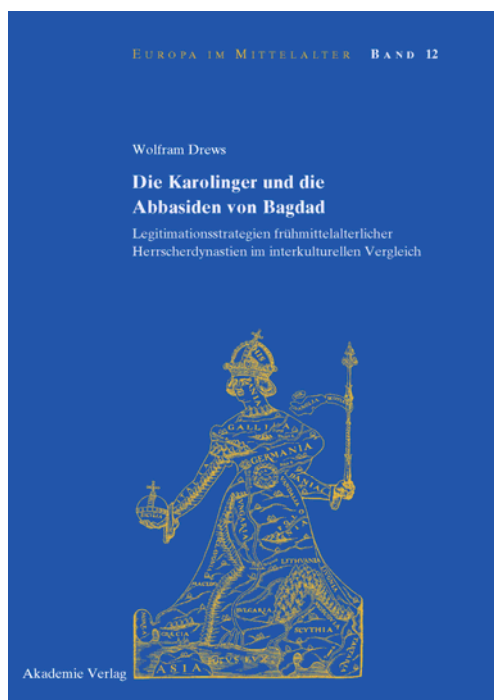

Wolfram Drews

## Die Karolinger und die Abbasiden von Bagdad

*Legitimationsstrategien frühmittelalterlicher Herrscherdynastien im transkulturellen Vergleich*

*Europa im Mittelalter. Abhandlungen und Beiträge zur historischen Komparatistik, Band 12*

2009. 502 Seiten, 170 x 240 mm,  
Festeinband, € 59,80  
ISBN 978-3-05-004560-3

Mitte des 8. Jh. wechselten sowohl im Frankenreich als auch im islamischen Kalifat die Herrscherdynastien, Merowinger und Umayyaden wurden nahezu zeitgleich durch Karolinger bzw. Abbasiden ersetzt.

Während die Abbasiden behaupteten, als Verwandte des verstorbenen Propheten Mohammed über ein spezielles, erbliches Charisma zu verfügen, das ihnen den Zugang zu einem unvergleichlichen, islamisch begründeten Herrschaftswissen eröffne, konstruierten die Karolinger mit Hilfe der Kirche, namentlich des römischen Papsttums, ein besonderes Amtcharisma, durch das sie sich als Vertreter eines verchristlichten Königtums und als geistliche Verwandte des Nachfolgers des heiligen Petrus inszenierten. Trotz aller Unterschiede versuchten beide Dynastien, sich als Exponenten eines sakral konnotierten Herrschertums zu etablieren. Die konkreten Spielräume, die sich den politischen Akteuren eröffneten, hingen jedoch entscheidend von den historischen Rahmenbedingungen ab, namentlich vom jeweiligen Stadium der religiösen Traditionsbildung und den vorherrschenden religiös-kulturellen Paradigmen zur Vergangenheitsrezeption. Untersucht werden erb- und amtscharismatische Konzeptualisierungen der Herrschaft, Fragen der Rekrutierung von Eliten sowie Probleme der Instrumentalisierung und Transformation religiöser Vorstellungen zum Zweck der Integration politischer Gemeinwesen. Die Arbeit unternimmt eine umfassende Kontextualisierung zweier „Ereignisse“ der politischen Geschichte, wobei sie Fragestellungen der Religions-, Kultur- und Sozialgeschichte aufgreift und funktionale Äquivalente in den beiden untersuchten religiös-politischen Systemen aufzeigt. Das Instrumentarium des Vergleichs ist wesentlich von den Kategorien Max Webers und Pierre Bourdieus inspiriert, wobei der methodische Ansatz des Vergleichs unter Aufnahme von Anregungen der neueren Globalgeschichte weiterentwickelt wird.
